# Supplementary material for: Interface Matters: The Stiffness Route to Stability of a Thermophilic Tetrameric Malate Dehydrogenase
Source: PubMed Central journal article supplement (PMC4250060; doi:10.1371/journal.pone.0113895), 2014-12-01
Supplement: pone.0113895.s008.pdf [file pone.0113895.s008.pdf]

**Table S1. Electrostatics and hydrophobicity at the interface. Complementary of Table 3 of the main text in absolute values in  $\text{\AA}^2$**

|               |                    | T = 300 K                    |                              |                        |            |               |
|---------------|--------------------|------------------------------|------------------------------|------------------------|------------|---------------|
|               | System             | $S_{\text{hydrophobic}}$ (%) | $S_{\text{hydrophilic}}$ (%) | $S_{\text{mixed}}$ (%) | H-bonds    | $N_{IP}$      |
| $\mathcal{M}$ | <i>m</i> interface | $629 \pm 37$                 | $780 \pm 31$                 | $1391 \pm 43$          | $44 \pm 3$ | $9.0 \pm 1.2$ |
|               | <i>d</i> interface | $431 \pm 27$                 | $683 \pm 25$                 | $384 \pm 22$           | $29 \pm 2$ | $4.0 \pm 0.2$ |
|               | <i>c</i> interface | $50 \pm 6$                   | $155 \pm 19$                 | $168 \pm 15$           | $7 \pm 2$  | $1.4 \pm 0.7$ |
| $\mathcal{T}$ | <i>m</i> interface | $724 \pm 29$                 | $644 \pm 28$                 | $1340 \pm 39$          | $33 \pm 3$ | $7.5 \pm 0.9$ |
|               | <i>d</i> interface | $577 \pm 25$                 | $634 \pm 27$                 | $458 \pm 29$           | $27 \pm 3$ | $5.9 \pm 1.0$ |
|               | <i>c</i> interface | $63 \pm 30$                  | $223 \pm 40$                 | $140 \pm 43$           | $20 \pm 3$ | $7.8 \pm 1.0$ |
|               |                    | T = 360 K                    |                              |                        |            |               |
| $\mathcal{M}$ | <i>m</i> interface | $744 \pm 41$                 | $825 \pm 42$                 | $1378 \pm 50$          | $44 \pm 3$ | $7.3 \pm 1.0$ |
|               | <i>d</i> interface | $462 \pm 32$                 | $609 \pm 38$                 | $416 \pm 28$           | $24 \pm 3$ | $4.0 \pm 0.3$ |
|               | <i>c</i> interface | $65 \pm 10$                  | $193 \pm 21$                 | $163 \pm 22$           | $9 \pm 2$  | $3.5 \pm 0.9$ |
| $\mathcal{T}$ | <i>m</i> interface | $782 \pm 34$                 | $675 \pm 36$                 | $1285 \pm 47$          | $37 \pm 3$ | $9.2 \pm 0.9$ |
|               | <i>d</i> interface | $531 \pm 45$                 | $606 \pm 49$                 | $481 \pm 34$           | $27 \pm 3$ | $7.3 \pm 1.0$ |
|               | <i>c</i> interface | $38 \pm 22$                  | $198 \pm 23$                 | $122 \pm 37$           | $19 \pm 2$ | $9.6 \pm 1.2$ |

Errors correspond to standard deviation.
