# Supplementary material for: Interface Matters: The Stiffness Route to Stability of a Thermophilic Tetrameric Malate Dehydrogenase
Source: PubMed Central journal article supplement (PMC4250060; doi:10.1371/journal.pone.0113895), 2014-12-01
Supplement: pone.0113895.s009.pdf [file pone.0113895.s009.pdf]

**Table S2. Intra and inter domain electrostatic energy in kcal/mol at 300K**

| System |               | internal        | <i>m</i> interface | <i>d</i> interface | <i>c</i> interface |
|--------|---------------|-----------------|--------------------|--------------------|--------------------|
| tetra  | $\mathcal{M}$ | $-5550 \pm 165$ | $-732 \pm 56$      | $-282 \pm 36$      | $-155 \pm 31$      |
|        | $\mathcal{T}$ | $-5214 \pm 124$ | $-820 \pm 72$      | $-346 \pm 55$      | $-512 \pm 171$     |
| mono   | $\mathcal{M}$ | $-5610 \pm 127$ | -                  | -                  | -                  |
|        | $\mathcal{T}$ | $-5319 \pm 81$  | -                  | -                  | -                  |

Errors correspond to standard deviation.
